# Supplementary material
Source: publisher figshare collection journal article supplement (https://tandf.figshare.com/articles/dataset/_/6653435)

2016-05-20 12:31:30 PTHD-1080 BitRate:11592Kbps,FrameRate:25fps

(a)

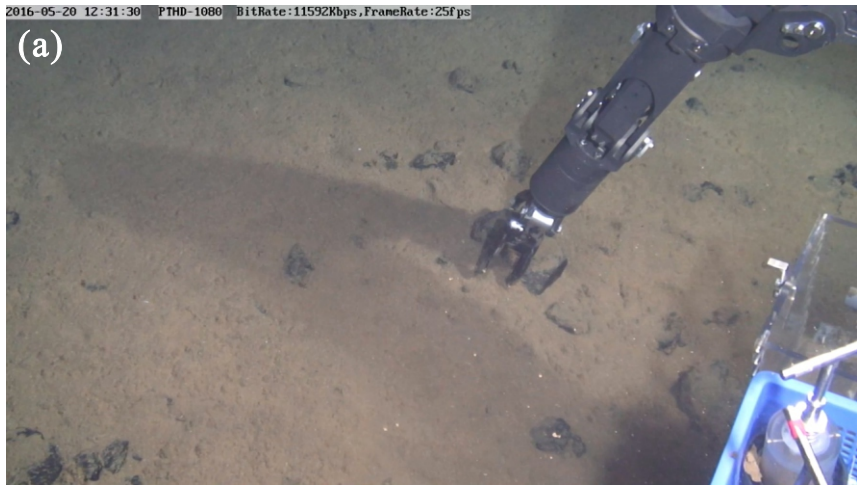

2016-05-20 14:59:38 PTHD-1080 BitRate:11562Kbps,FrameRate:25fps

(b)

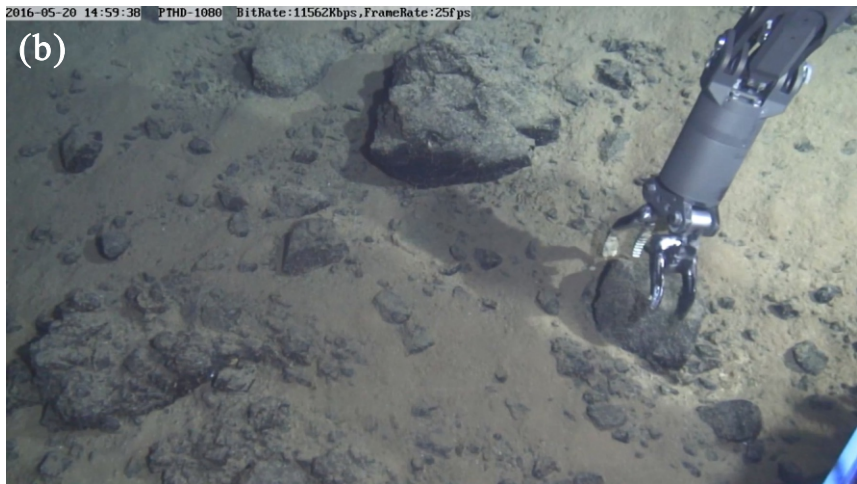

Supplement: Supplementary file 1 [file 1]

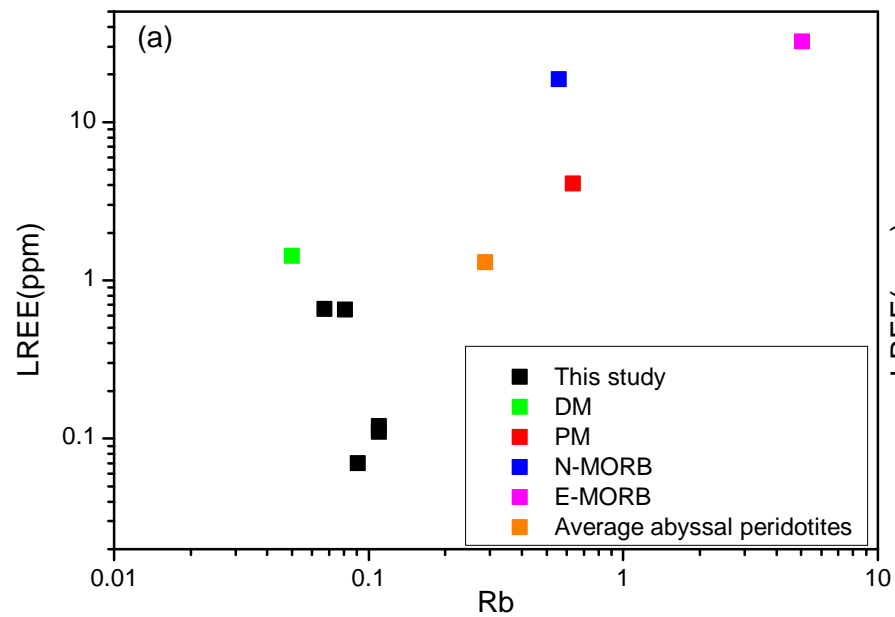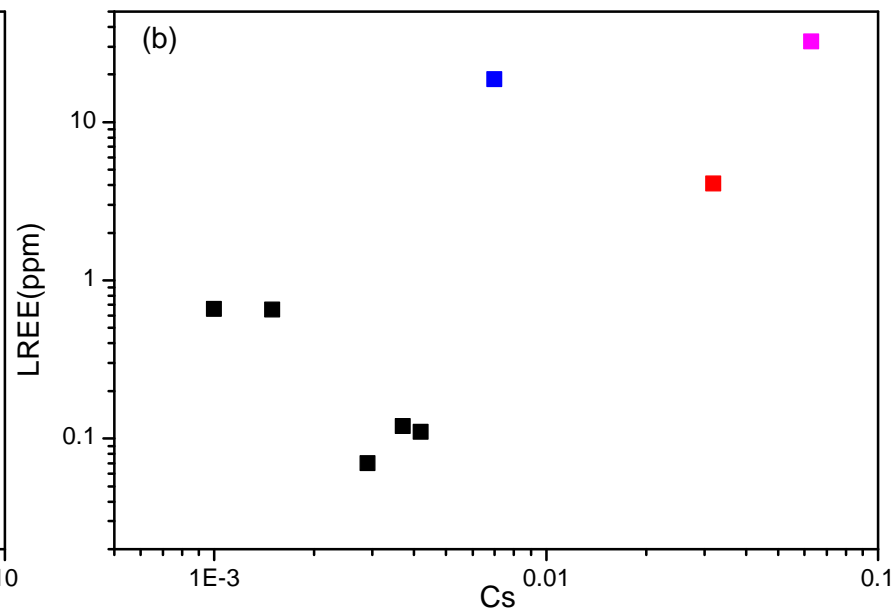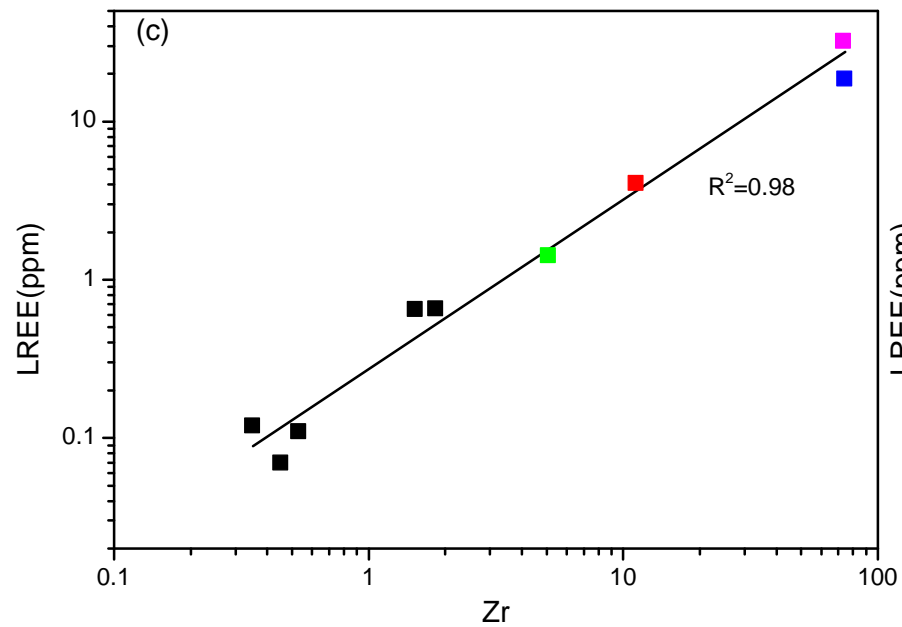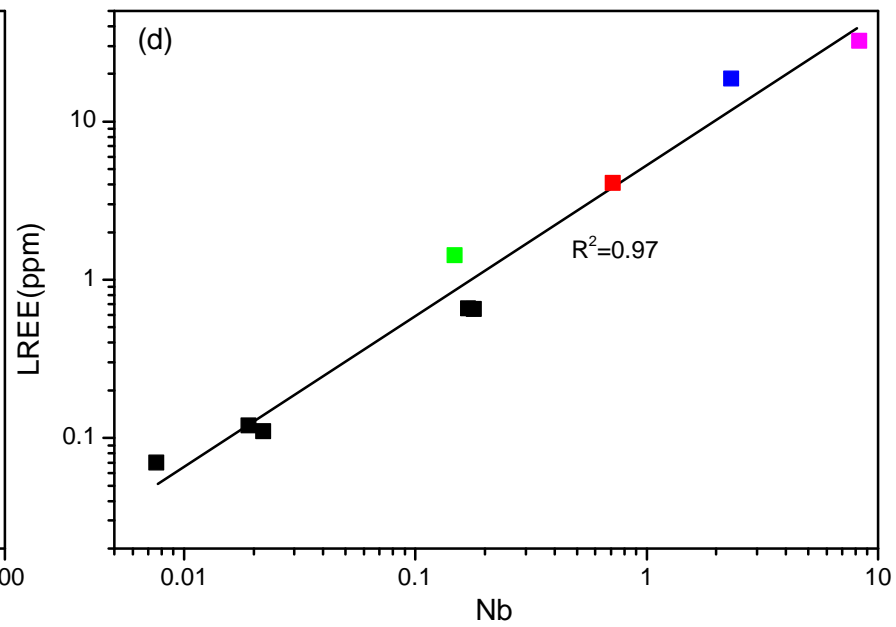

Supplement: Supplementary file 2 [file 1]
